# Supplementary material for: Differential DNA accessibility to polymerase enables 30-minute phenotypic β-lactam antibiotic susceptibility testing of carbapenem-resistant Enterobacteriaceae
Source: PLoS Biol. 2020 Mar 19;18(3):e3000652. doi: 10.1371/journal.pbio.3000652 (PMC7081982; doi:10.1371/journal.pbio.3000652)
Supplement: S2 Table — Clinical samples were obtained from the UCLA CML. MICs based on broth microdilution performed by UCLA CML are provided along with urinalysis results. (XLSX) [file pbio.3000652.s002.xlsx]

## Sheet: S2_Table
Internal Sample Number	Source	Specimen Type	Days Post Collection pol-aASt Experiment Performed	Antibiotic Tested	Enterobacteriaceae Organism Isolated	ETP MIC (ug/mL)	AMP MIC (ug/mL)	Additional Organism Isolated	Urine Color	Specific Gravity	pH	Blood	Bilirubin	Ketones	Glucose	Protein	Leukocyte Esterase	Nitrite	Red Blood Cells (cells/uL)	White Blood Cells (cells/uL)	Squamous Epithelial Cells (cells/uL)
1	UCLA CML	Urine, Clean Catch, Midstream	4	ETP	Escherichia coli	<=0.5	>=32	None	Yellow	1.01	7	3+	NEG	NEG	NEG	1+	3+	NEG	>1,000	>1,000	2
2	UCLA CML	Urine, Clean Catch, Midstream	4	ETP	Escherichia coli	<=0.5	>=32	None	Yellow	1.021	<=5.0	2+	NEG	NEG	NEG	Trace	3+	POS	142	862	19
3	UCLA CML	Urine, Clean Catch, Midstream	4	ETP	Escherichia coli	<=0.5	<=2	None	Yellow	1.01	8	Trace	NEG	NEG	NEG	NEG	3+	POS	5	33	20
4	UCLA CML	Urine, Clean Catch, Midstream	4	ETP	Escherichia coli	<=0.5	4	Viridans group Streptococcus	Amber	>1.060	7	3+	POS	NEG	NEG	NEG	3+	NEG	114	190	3
5	UCLA CML	Urine, Clean Catch, Midstream	4	ETP	Escherichia coli	<=0.5	>=32	None	Yellow	1.023	8	2+	NEG	NEG	NEG	1+	1+	POS	141	115	17
6	UCLA CML	Urine, Clean Catch, Midstream	4	ETP	Escherichia coli	<=0.5	>=32	Enterococcus species	Yellow	1.011	6	1+	NEG	NEG	NEG	1+	3+	POS	196	>1,000	0
7	UCLA CML	Urine, Clean Catch, Midstream	4	ETP	Escherichia coli	<=0.5	4	None	Yellow	1.008	7	2+	NEG	Trace	NEG	NEG	3+	POS	10	167	2
8	UCLA CML	Urine, Clean Catch, Midstream	4	ETP	Escherichia coli	<=0.5	>=32	None	Yellow	1.016	6	NEG	NEG	NEG	NEG	NEG	Trace	POS	4	161	10
9	UCLA CML	Urine, Clean Catch, Midstream	4	ETP	Escherichia coli	<=0.5	<=2	None	Yellow	1.013	6	2+	NEG	NEG	NEG	NEG	Trace	NEG	259	230	4
10	UCLA CML	Urine, Clean Catch, Midstream	4	ETP	Escherichia coli	<=0.5	>=32	None	Yellow	1.009	6	NEG	NEG	NEG	NEG	NEG	2+	POS	9	317	0
11	UCLA CML	Urine, Clean Catch, Midstream	4	ETP	Escherichia coli	<=0.5	4	None	Yellow	1.006	6	2+	NEG	NEG	NEG	NEG	3+	POS	45	780	7
12	UCLA CML	Urine, Catheterized - In/Out	4	ETP	Escherichia coli	<=0.5	<=2	None	Yellow	1.012	6	2+	NEG	Trace	NEG	2+	3+	NEG	111	>1,000	5
13	UCLA CML	Urine, Clean Catch, Midstream	4	ETP	Escherichia coli	<=0.5	>=32	None	Yellow	1.011	6	2+	NEG	Trace	NEG	2+	3+	POS	91	>1,000	0
14	UCLA CML	Urine, Clean Catch, Midstream	3	ETP	Escherichia coli	<=0.5	>=32	None	Straw	<1.005	7	2+	NEG	NEG	NEG	NEG	2+	NEG	6	13	0
15	UCLA CML	Urine, Clean Catch, Midstream	3	ETP	Escherichia coli	<=0.5	4	None	Straw	1.011	6	1+	NEG	NEG	NEG	NEG	Trace	NEG	7	74	4
16	UCLA CML	Urine, Clean Catch, Midstream	3	ETP	Escherichia coli	<=0.5	<=2	None	Yellow	1.011	7	NEG	NEG	NEG	NEG	1+	3+	NEG	0	968	1
17	UCLA CML	Urine, Clean Catch, Midstream	3	ETP	Escherichia coli	<=0.5	>=32	None	Light Yellow	1.014	6	NEG	NEG	NEG	NEG	NEG	3+	NEG	2	67	0
18	UCLA CML	Urine, Clean Catch, Midstream	5	AMP	Escherichia coli	≤0.5	≥32	None	Yellow	1.024	≤5	3+	NEG	TRACE	1+	1+	1+	NEG	510	660	12
19	UCLA CML	Urine, Clean Catch, Midstream	5	AMP	Escherichia coli	≤0.5	≥32	None	Straw	1.011	6	1+	NEG	NEG	NEG	NEG	2+	NEG	16	440	2
20	UCLA CML	Urine, Clean Catch, Midstream	5	AMP	Escherichia coli	≤0.5	≥32	None	Yellow	1.02	7	1+	NEG	NEG	NEG	NEG	2+	POS	23	144	0
21	UCLA CML	Urine, Clean Catch, Midstream	4	AMP	Escherichia coli	≤0.5	≥32	None	Yellow	1.019	≤5	NEG	NEG	NEG	NEG	NEG	3+	POS	1	99	21
22	UCLA CML	Urine, Clean Catch, Midstream	4	AMP	Escherichia coli	≤0.5	≤2	None	Dark Yellow	1.017	7	1+	NEG	TRACE	NEG	2+	TRACE	POS	72	259	52
23	UCLA CML	Urine, Clean Catch, Midstream	4	AMP	Escherichia coli	≤0.5	≤2	None	Yellow	1.018	7	NEG	NEG	NEG	NEG	NEG	NEG	NEG	7	14	0
24	UCLA CML	Urine, Clean Catch, Midstream	4	AMP	Escherichia coli	≤0.5	≤2	None	Yellow	1.023	6	2+	NEG	TRACE	NEG	NEG	3+	NEG	125	>1,000	0
25	UCLA CML	Urine, Clean Catch, Midstream	5	AMP	Escherichia coli	≤0.5	≤2	None	Yellow	1.011	6	1+	NEG	NEG	NEG	NEG	3+	POS	126	>1,000	0
