# Supplementary material for: Differential DNA accessibility to polymerase enables 30-minute phenotypic β-lactam antibiotic susceptibility testing of carbapenem-resistant Enterobacteriaceae
Source: PLoS Biol. 2020 Mar 19;18(3):e3000652. doi: 10.1371/journal.pbio.3000652 (PMC7081982; doi:10.1371/journal.pbio.3000652)
Supplement: S6 Table — Negative percentage release values were set to zero before averaging. Averages and standard deviations of each isolate/antibiotic combination were calculated using GraphPad Prism. (XLSX) [file pbio.3000652.s006.xlsx]

## Sheet: Sheet1
	no ABX			CRO			ETP			MEM
1 (S)	2.05805	0	0.0432099	5.22388	6.23557	10.7921	19.0647	12.7273	15.3261	23.5602	22.8448	23.8056
2 (S)	0	0	0.155902	6.69546	5.74074	4.69484	15.3846	18.2648	8.93204	20.2	16.2602	20.1536
3 (R)	0.53701	0.387097	0.0393258	0.1	0	0.243386	0.281481	0	0.135417	0.253731	0	0.257919
4 (R)	0.206186	0	0.328283	0.264798	0.122699	0.332481	0.506993	0.12605	0	0	0	0.30303
